# Supplementary material for: A Microfluidic Spheroid Culture Device with a Concentration Gradient Generator for High-Throughput Screening of Drug Efficacy
Source: Preprints.org preprint supplement (doi:10.20944/preprints201811.0608.v1), 2018-11-28
Supplement: Supplementary file 2 [file supplementary]

**Supplementrary Materials to A microfluidic spheroid culture device with a concentration gradient generator for high-throughput screening of drug efficacy**

Wanyoung Lim1 and Sungsu Park1,2,*

1 Department of Biomedical Engineering, Sungkyunkwan University, Suwon, Korea.

2 School of Mechanical Engineering, Sungkyunkwan University, Suwon, Korea.

*Corresponding author: S. Park. Address: School of Mechanical Engineering, Sungkyunkwan University, Seobu-ro, Suwon 16419, Kyunggi-do, Republic of Korea/Email: nanopark@skku.edu/ Tel: +82-31-290-7431/Fax:+82-31-290-5889


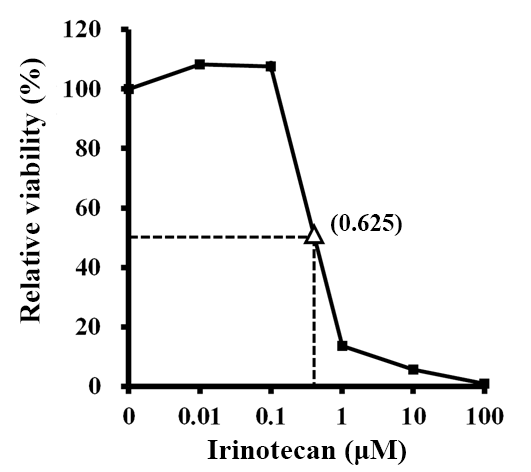


**Supplementary Figure 1.** Relative cell viability of HCT116 monolayers with the treatment of irinotecan at different concentrations (0–100 μM) for 72 h. Cell viability was measured using the EZ-cytox Cell Viability Assay Kit (Daeillab Service, Seoul, Korea).


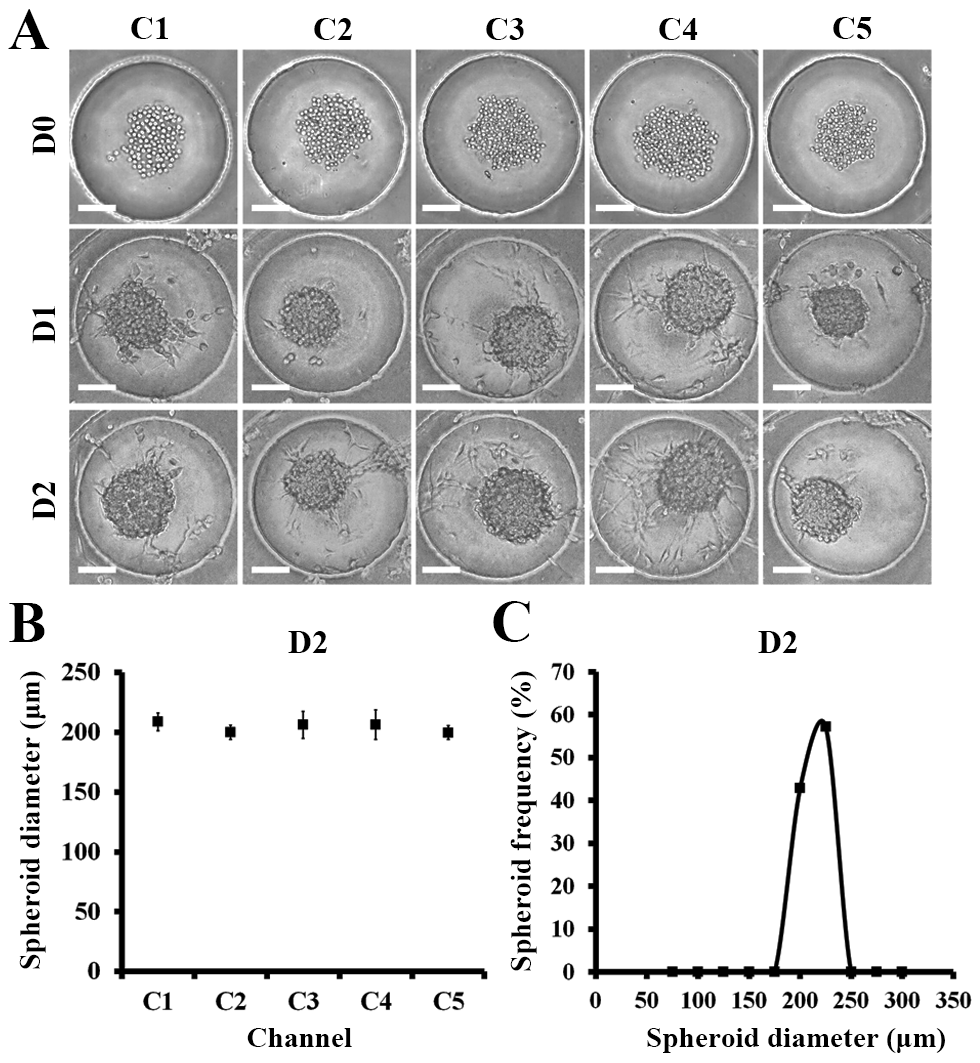


**Supplementary Figure 2.** U87 spheroid formation in the μFSCD with a CGG at different days (0–2). (A) Optical images of spheroids formed in concave microwells. Scale bars, 100 μm; (B) Spheroid diameters in each channel at D2 (n = 10); (C) Spheroid diameter frequency distribution at day 2 (n = 50).
